# Supplementary figures and images for: Targeting CA-125 Transcription by Development of a Conditionally Replicative Adenovirus for Ovarian Cancer Treatment
Source: MDPI journal article supplement (doi:10.3390/cancers13174265), 2021-08-24

E1A

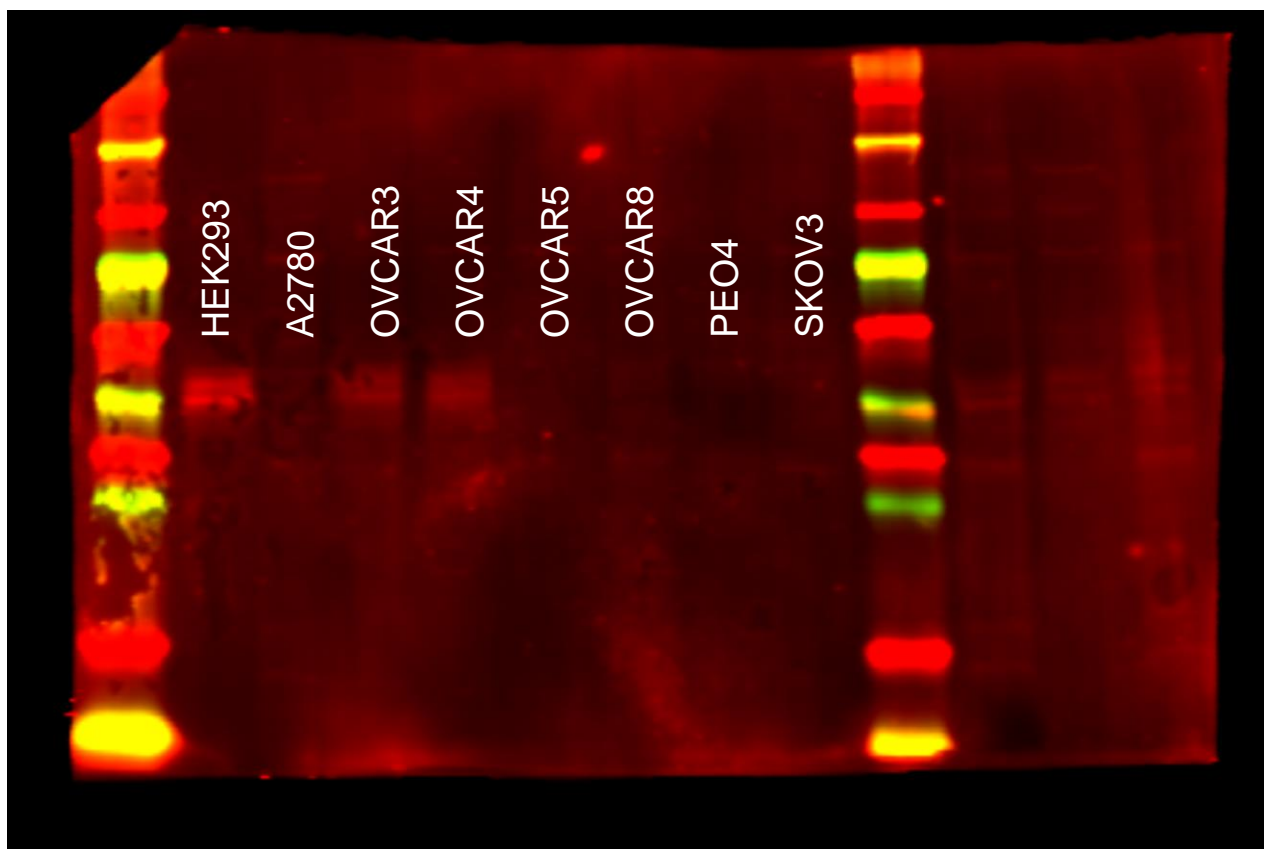

$\beta$ -actin

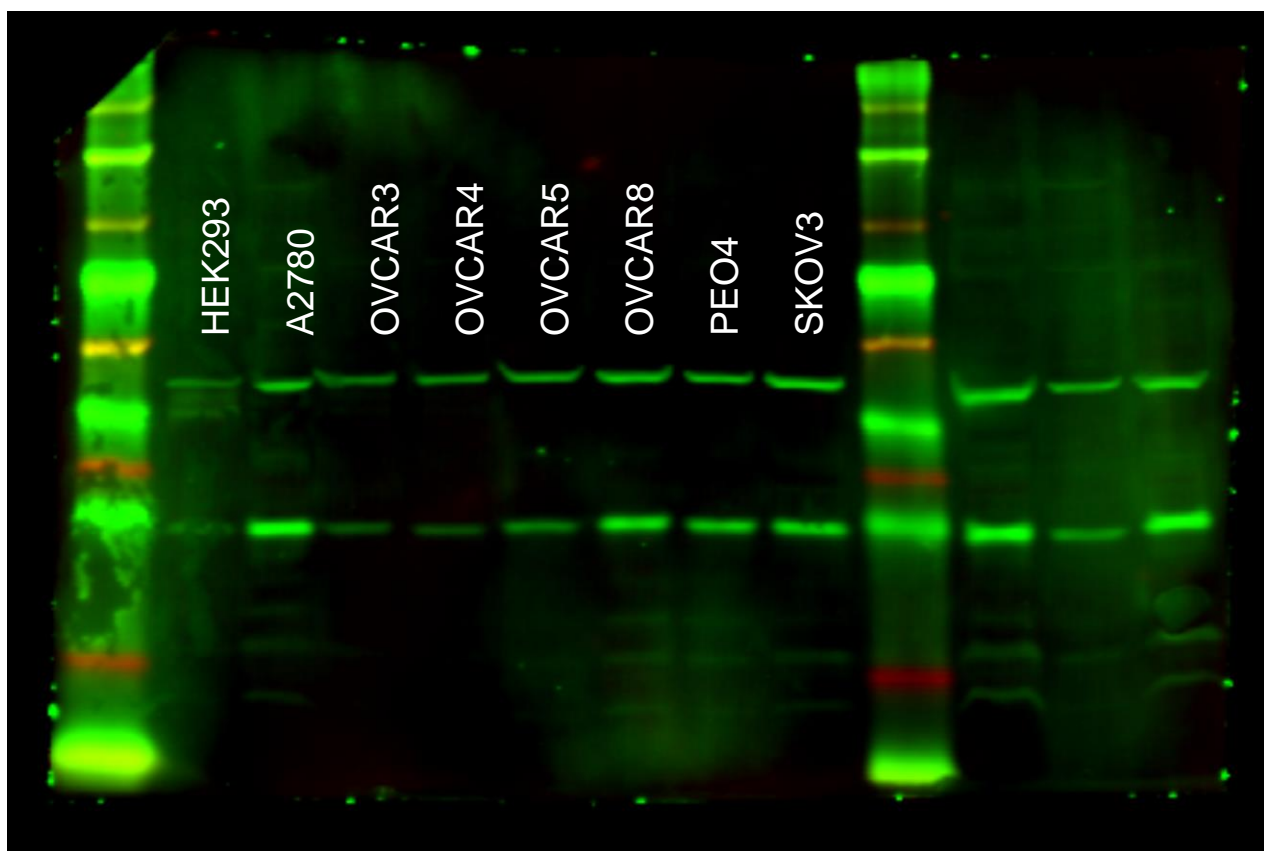

Supplement: s1 [file s1]
